# Supplementary material
Source: PubMed Central journal article supplement (PMC8930274)
Supplement: NIHMS1783862-supplement-Tables_--_supplementary.pdf [file NIHMS1783862-supplement-Tables_--_supplementary.pdf]

## Tables

Supplemental Table I. Patient Demographic and Medical History.

| <b>Supplemental Table 1. Patient Demographic Characteristics and Medical History</b> |                               |                       |
|--------------------------------------------------------------------------------------|-------------------------------|-----------------------|
| <b>Gender</b>                                                                        | <b>Number of Participants</b> | <b>Percentage (%)</b> |
| Female                                                                               | 16                            | 53.3                  |
| Male                                                                                 | 14                            | 46.7                  |
| <b>Mean Age (years, Std, Range)</b>                                                  | 58, 6.5, 50-77                |                       |
| <b>Marital Status</b>                                                                |                               |                       |
| Single                                                                               | 6                             | 20                    |
| Married                                                                              | 9                             | 30                    |
| Divorced                                                                             | 8                             | 26.7                  |
| Widowed                                                                              | 7                             | 23.3                  |
| <b>Highest Educational Attainment</b>                                                |                               |                       |
| Higher Education                                                                     | 12                            | 40.0                  |
| Secondary Special Education                                                          | 18                            | 60.0                  |
| <b>Employment Status</b>                                                             |                               |                       |
| Unemployed                                                                           | 4                             | 13.3                  |
| Part-Time Work                                                                       | 3                             | 10.0                  |
| Full-Time Work                                                                       | 13                            | 43.3                  |
| Retired                                                                              | 10                            | 33.3                  |
| <b>Medical History</b>                                                               |                               |                       |
| Months since HIV Diagnosis (months, Std)                                             | 2.1, 1.5                      |                       |
| <b>ART Treatment</b>                                                                 |                               |                       |
| Currently taking ART                                                                 | 22                            | 73.3                  |
| Not taking ART                                                                       | 8                             | 26.7                  |
| <b>Co-Morbidity</b>                                                                  |                               |                       |
| DM                                                                                   | 1                             | 3.3                   |
| HTN                                                                                  | 4                             | 13.3                  |
| Hepatitis                                                                            | 3                             | 10.0                  |
| <b>History of Opportunistic Infection</b>                                            |                               |                       |
| Total                                                                                | 13                            | 43.3                  |
| TB                                                                                   | 5                             | 16.7                  |
| Herpes Zoster                                                                        | 2                             | 6.7                   |
| Meningitis/Meningoencephalitis                                                       | 3                             | 10.0                  |
| Other                                                                                | 3                             | 10.0                  |
| <b>Mode of Transmission (self-reported)</b>                                          |                               |                       |

|                                                       |    |      |
|-------------------------------------------------------|----|------|
| Heterosexual Sex (Partner status negative or unknown) | 14 | 46.7 |
| Heterosexual Sex (known contact with HIV+ person)     | 4  | 13.3 |
| MSM                                                   | 1  | 3.3  |
| Injection Drug Use                                    | 5  | 16.7 |
| Declined                                              | 6  | 20.0 |

Supplemental Table II. Location of Diagnosis.

| <b>Supplemental Table II. Location of Diagnosis</b> |                        |             |
|-----------------------------------------------------|------------------------|-------------|
| Location of Diagnosis                               | Number of Participants | Percent (%) |
| Hospitalization with infectious process             | 11                     | 36.7        |
| Hospitalization due to other medical problem        | 3                      | 10.0        |
| Outpatient clinic, acute illness                    | 3                      | 10.0        |
| Outpatient clinic, routine testing                  | 12                     | 40.0        |
| Self-tested at independent laboratory               | 1                      | 3.3         |
